# Supplementary material
Source: PubMed Central journal article supplement (PMC3755107)
Supplement: NIHMS429954-supplement-01.pdf [file NIHMS429954-supplement-01.pdf]

# Supplemental Figure 1

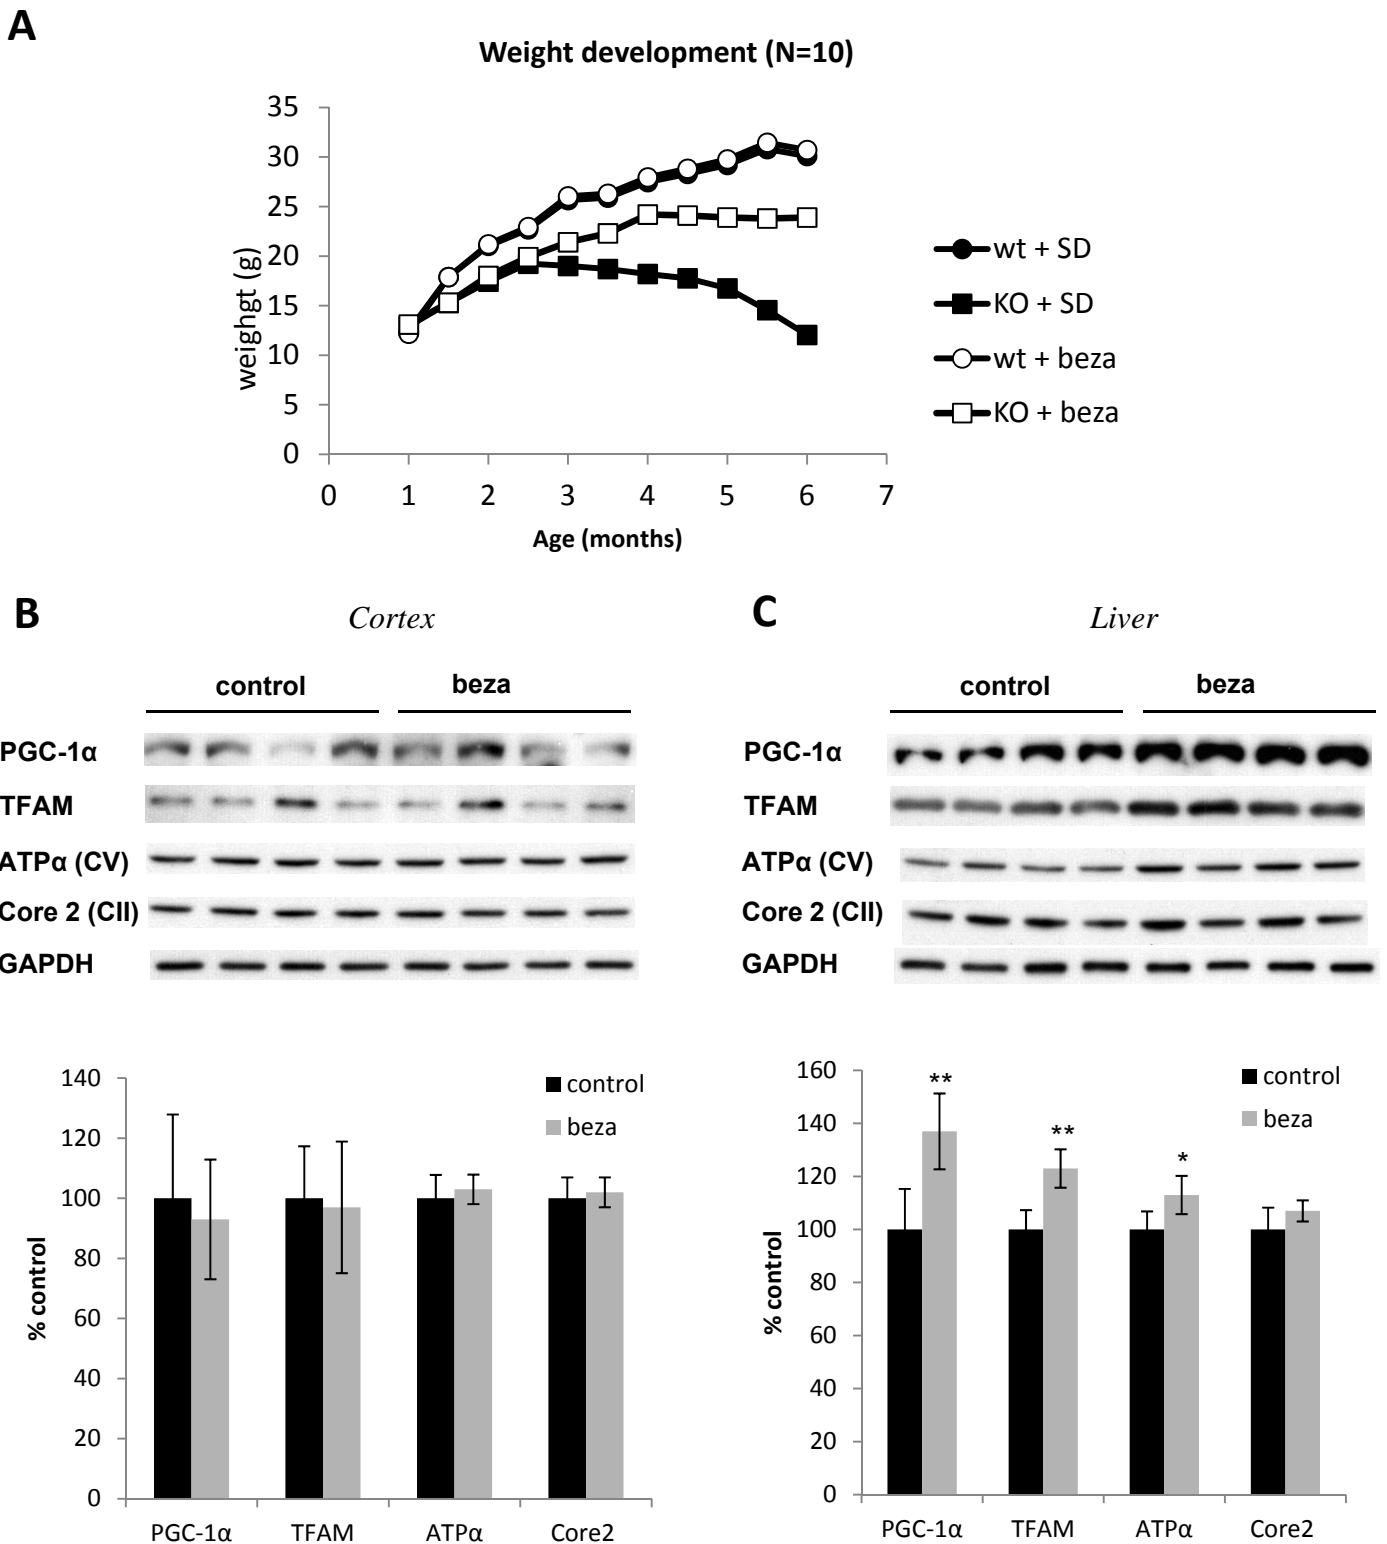

**Figure S1:** (A) Weight development of male wild-type and COX10 KO mice fed SD- or bezafibrate diet. (B+C) Western blot incl. densitometric analysis of cortex and liver of wild-type mice injected with bezafibrate (100 mg/g/d, 7 days). Control mice were injected with DMSO. Blots were probed for PGC-1 $\alpha$ , TFAM and OXPHOS subunits. GAPDH was used as a loading control. \*  $p < 0.05$ , \*\*  $p < 0.01$

## Supplemental Figure 2

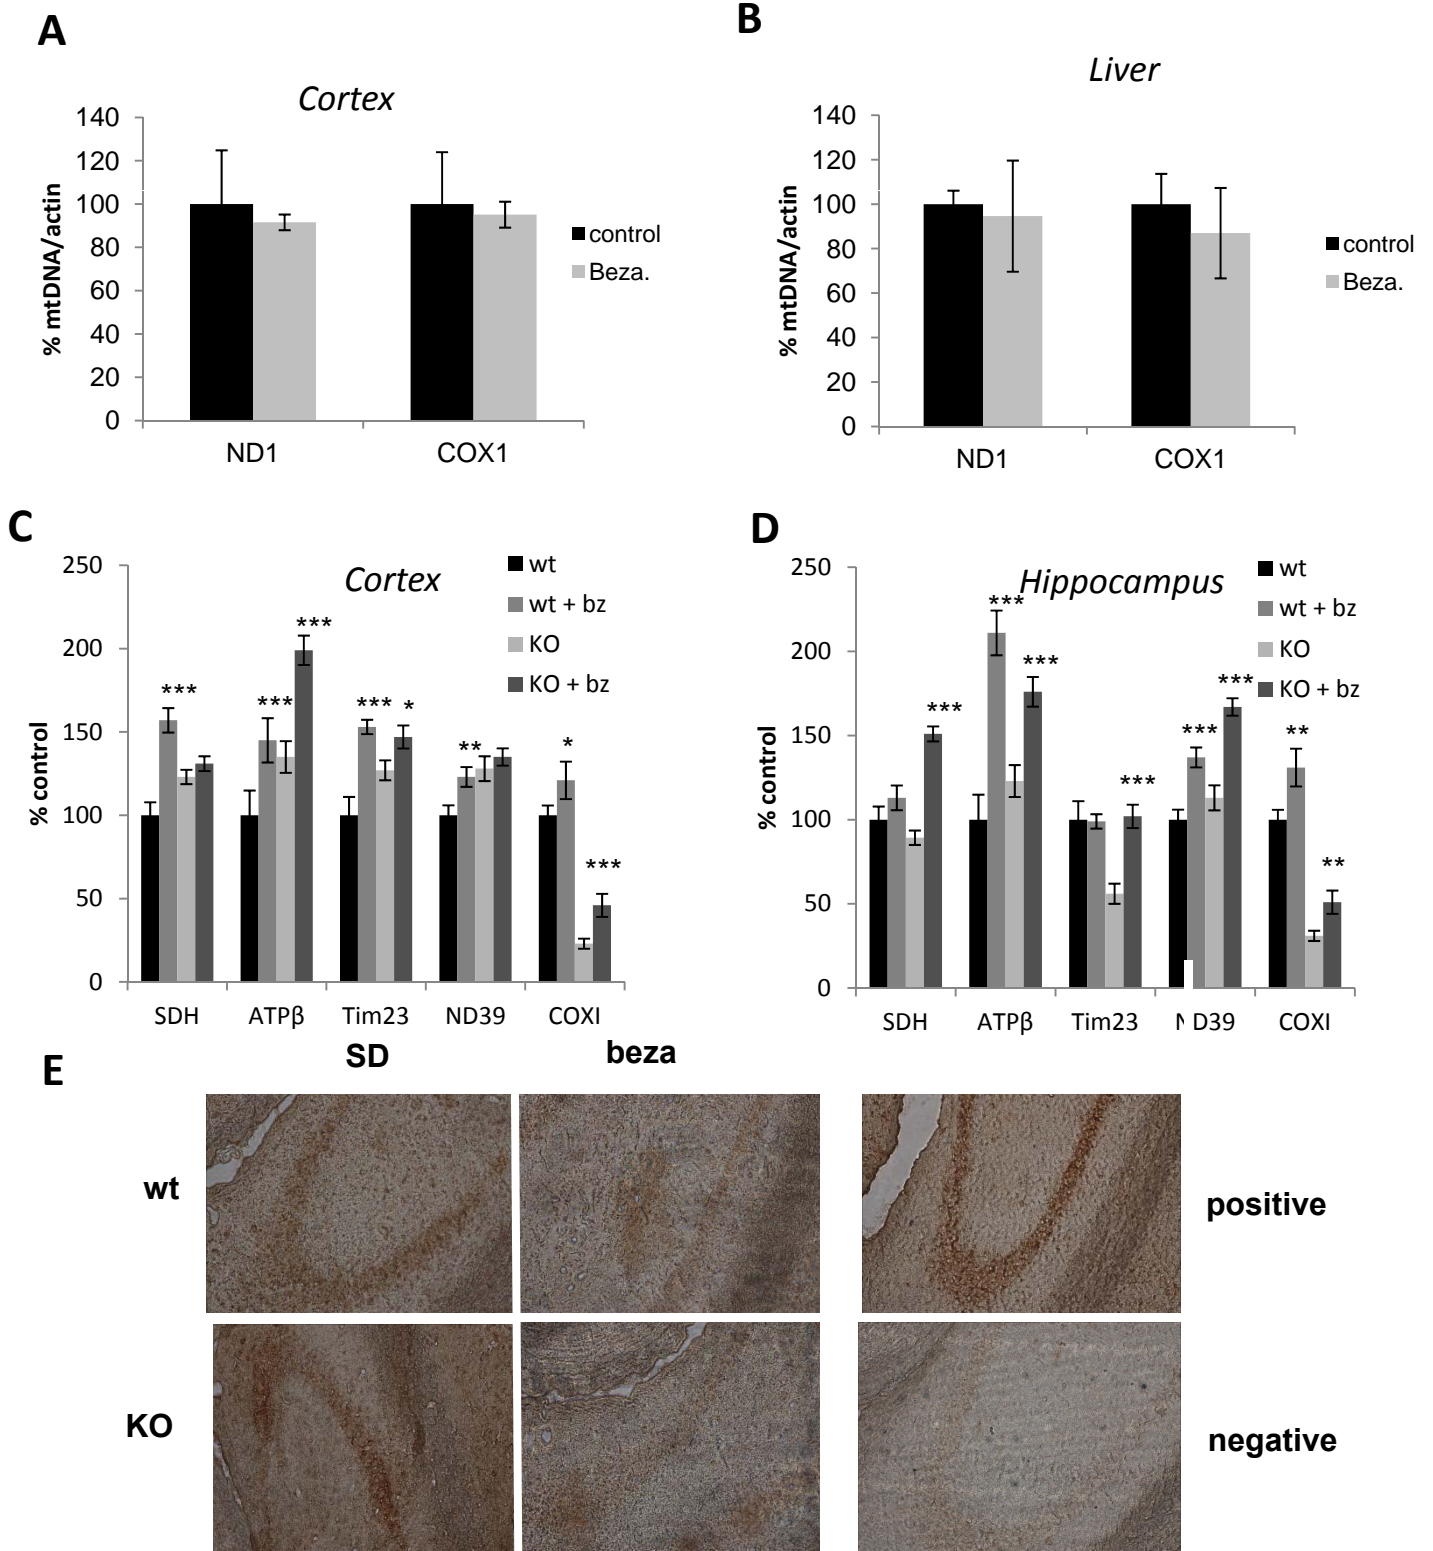

**Figure S2:** (A+B) mtDNA levels of cortex and liver samples of control mice treated with bezafibrate. Primers target for COX1 and ND1 were used for the quantification. (C+D) Densitometric analysis of western blots from Fig. 2E and F. \*  $p < 0.05$ , \*\*  $p < 0.01$ , \*\*\*  $p < 0.001$  (E) Immunohistochemistry of the hippocampus from 6 months old wild-type and COX10 KO animals on a standard or on a bezafibrate diet using anti-8-OH-Guanosine antibody. Positive control was incubated with  $H_2O_2$ , negative control was incubated with RNaseA and DNase.

### Supplemental Figure 3

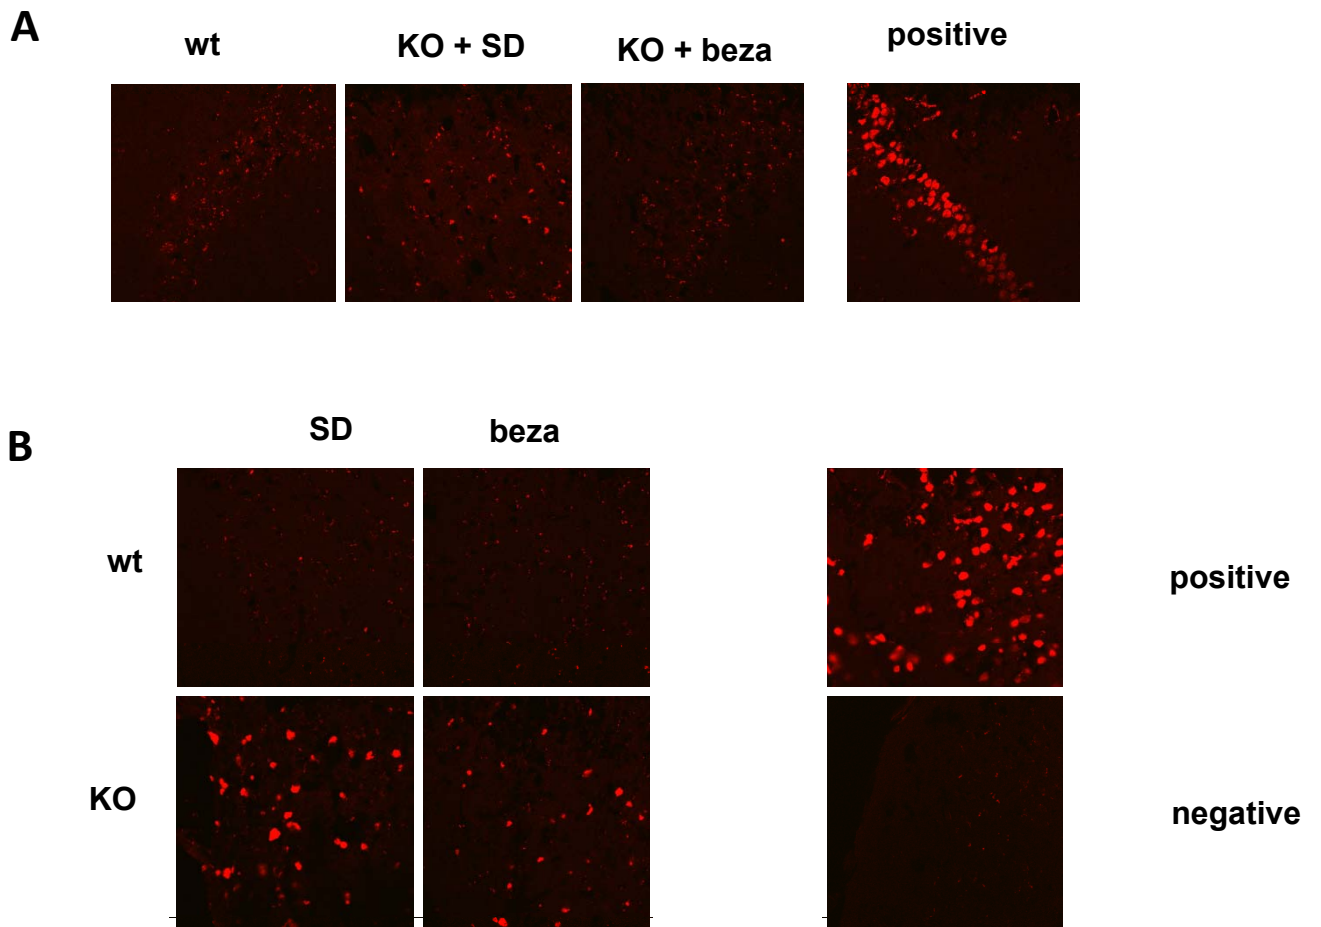

**Figure S3: (A+B)** TUNEL staining of the hippocampal CA3 region and cortex region from 6 months old wild-type and COX10 KO animals on a standard or on a bezafibrate diet.

## Supplemental Figure 4

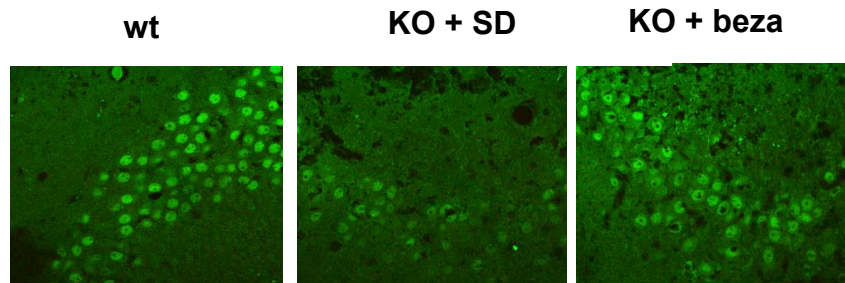

**Figure S4:** Immunohistochemistry of the hippocampal CA3 region from 6 months old wild-type and COX10 KO animals on a standard or on a bezafibrate diet using anti-NeuN antibody.
